# Supplementary material for: Use of Porphysomes to detect primary tumour, lymph node metastases, intra-abdominal metastases and as a tool for image-guided lymphadenectomy: proof of concept in endometrial cancer
Source: PubMed Central journal article supplement — Theranostics. 2019 Apr 13;9(9):2727–38. doi: 10.7150/thno.31225 (PMC6525988; doi:10.7150/thno.31225), 2019-04-13
Supplement: thnov09p2727s1.pdf [file thnov09p2727s1.pdf]

**Table S1:** Organs and tissues for biodistribution

|                                             |                                                                                    |
|---------------------------------------------|------------------------------------------------------------------------------------|
| Heart (with removal of intra-cardiac clot)  | Adrenal glands                                                                     |
| Lung                                        | Kidney                                                                             |
| Liver                                       | Small intestine (ileum, with removal of intra-intestinal contents)                 |
| Spleen                                      | Large intestine (colon distal to cecum, with removal of intra-intestinal contents) |
| Gallbladder (with removal of bile contents) | Ovaries                                                                            |
| Ovary                                       | Uterus (uninvolved with tumour)                                                    |
| Skin (ventral abdominal)                    | Muscle (left psoas)                                                                |

**Table S2:** Number of specimens in each group for fluorescence signal-to-background ratio analysis

| Group              | Specimen Type        | VX2 positive | VX2 negative |
|--------------------|----------------------|--------------|--------------|
| <b>All Rabbits</b> | Tumour               | 17           | 0            |
|                    | Lymph Node           | 60           | 15           |
|                    | Abdominal Metastases | 42           | 5            |
|                    | All specimens        | 119          | 20           |
| <b>1mg/kg</b>      | Tumour               | 7            | 0            |
|                    | Lymph Node           | 29           | 9            |
|                    | Abdominal Metastases | 10           | 1            |
|                    | All specimens        | 46           | 10           |
| <b>4mg/kg</b>      | Tumour               | 10           | 0            |
|                    | Lymph Node           | 31           | 6            |
|                    | Abdominal Metastases | 32           | 4            |
|                    | All specimens        | 73           | 10           |
| <b>In vivo</b>     | Tumour               | 12           | 0            |
|                    | Lymph Node           | 41           | 10           |
|                    | Abdominal Metastases | 37           | 3            |
|                    | All specimens        | 90           | 13           |
| <b>Cultured</b>    | Tumour               | 5            | 0            |
|                    | Lymph Node           | 19           | 5            |
|                    | Abdominal Metastases | 4            | 2            |
|                    | All specimens        | 28           | 7            |

**Table S3:** Number of specimens in each group for biodistribution analysis

| <b>Group</b>       | <b>Specimen Type</b> | <b>Fluorescent<br/>VX2 positive</b> | <b>Fluorescent<br/>VX2 negative</b> | <b>Non-fluorescent<br/>VX2 negative</b> |
|--------------------|----------------------|-------------------------------------|-------------------------------------|-----------------------------------------|
| <b>All Rabbits</b> | All specimens        | 46                                  | 21                                  | 38                                      |
|                    | Uterus / Tumour      | 13                                  | 13                                  | 0                                       |
|                    | Lymph Nodes          | 24                                  | 8                                   | 15                                      |
|                    | Omental metastases   | 4                                   | 0                                   | 7                                       |
|                    | Abdominal metastases | 5                                   | 0                                   | 16                                      |
| <b>1mg/kg</b>      | All specimens        | 17                                  | 10                                  | 15                                      |
|                    | Uterus / Tumour      | 5                                   | 5                                   | 0                                       |
|                    | Lymph Nodes          | 11                                  | 5                                   | 7                                       |
|                    | Omental metastases   | 0                                   | 0                                   | 0                                       |
|                    | Abdominal metastases | 1                                   | 0                                   | 8                                       |
| <b>4mg/kg</b>      | All specimens        | 29                                  | 11                                  | 19                                      |
|                    | Uterus / Tumour      | 8                                   | 8                                   | 0                                       |
|                    | Lymph Nodes          | 13                                  | 3                                   | 8                                       |
|                    | Omental metastases   | 4                                   | 0                                   | 3                                       |
|                    | Abdominal metastases | 4                                   | 0                                   | 8                                       |
| <b>In vivo</b>     | All specimens        | 34                                  | 16                                  | 15                                      |
|                    | Uterus / Tumour      | 10                                  | 10                                  | 0                                       |
|                    | Lymph Nodes          | 17                                  | 6                                   | 9                                       |
|                    | Omental metastases   | 4                                   | 0                                   | 2                                       |
|                    | Abdominal metastases | 3                                   | 0                                   | 4                                       |
| <b>Cultured</b>    | All specimens        | 12                                  | 5                                   | 18                                      |
|                    | Uterus / Tumour      | 3                                   | 3                                   | 0                                       |
|                    | Lymph Nodes          | 7                                   | 2                                   | 6                                       |
|                    | Omental metastases   | 0                                   | 0                                   | 0                                       |
|                    | Abdominal metastases | 2                                   | 0                                   | 12                                      |

**Figure S1.** Sensitivity and specificity formulas

Sensitivity:  $\text{true positives} / (\text{true positives} + \text{false negatives})$

Specificity:  $\text{true negatives} / (\text{true negatives} + \text{false positives})$

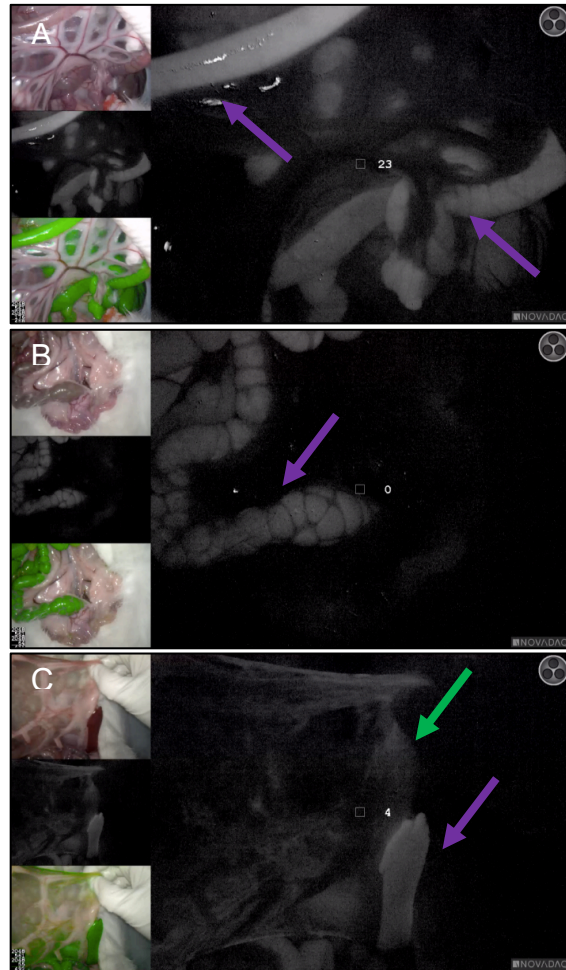

**Figure S2.** Background organ fluorescence, *in vivo* porphyrin fluorescence-guided resection (PYRO-FGR), PINPOINT imaging system, 675nm, greyscale filter. (A) Rabbit 28: 1 mg/kg, Ileum (loops, purple arrow). (B) Rabbit 30: 1 mg/kg, Sigmoid colon (purple arrow). (C) Rabbit 33: 4 mg/kg, Spleen (purple arrow), Omentum (green arrow).

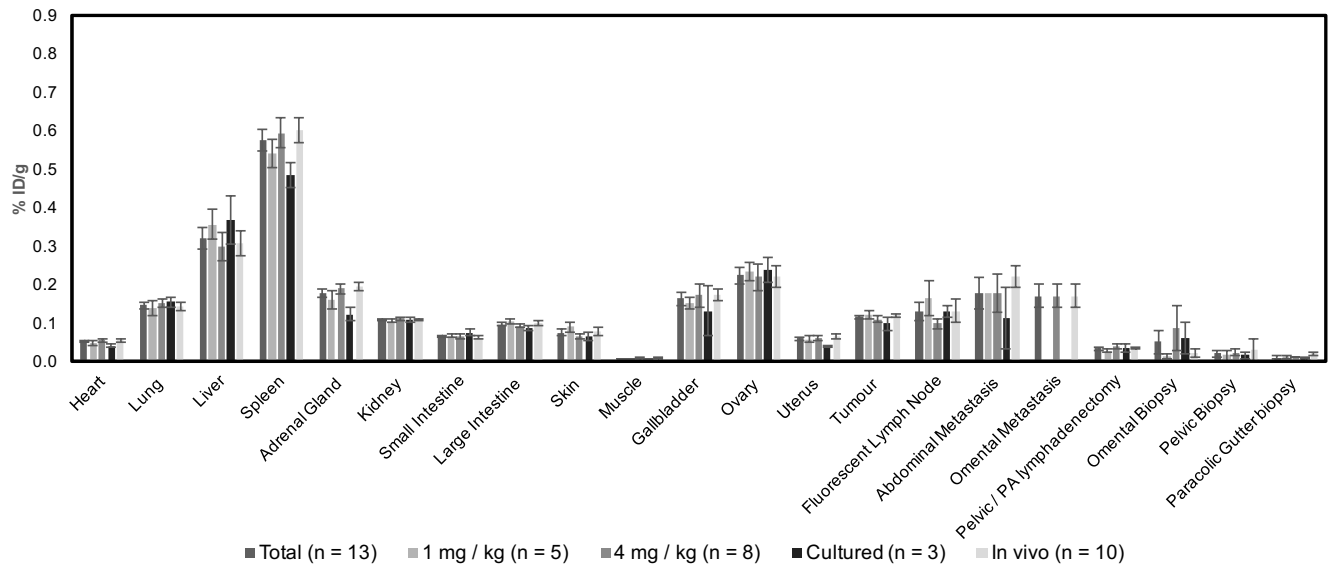

**Figure S3:** Porphysome biodistribution at 24 h post injection by rabbit group. %ID/g = percent injected dose per gram

**Video S1:** Uterine Tumour PYRO-FGR, Rabbit 11 (4 mg/kg).

**Video S2:** Metastatic Left Pelvic Lymph Nodes PYRO-FGR, Rabbit 9 (4 mg/kg).

**Video S3:** Omental Metastases PYRO-FGR, Rabbit 11 (4mg/kg), Rabbit 12 (4 mg/kg).
